# Supplementary material
Source: PubMed Central journal article supplement (PMC3354960)

## SUPPORTING INFORMATION

Zhongmei Tang, Martha V. Martin, and F. Peter Guengerich

Elucidation of functions of human cytochrome P450 enzymes: Identification of endogenous substrates in tissue extracts using metabolomic and isotopic labeling approaches

*Anal. Chem.* 81, 000-000 (2009)

### TABLE OF CONTENTS

**Table S-1.** Main ion fragments of the oxidation products of human P450 1A2 and liver extract reaction mixture by UPLC-MS-MS (ESI negative mode).

**Figure S-1.** GC-MS analysis of fatty acids in human liver extract.

**Figure S-2.** Spectral changes induced by binding of C14:0 to P450 2C8.

**Figure S-3.** GC-mass spectra of the hydroxylation product of the incubation of C14:0 with P450 1A2.

**Table S-1. Main ion fragments of the oxidation products of human P450 1A2 and liver extract reaction mixture by UPLC-MS-MS (ESI negative mode)**

| [M-H] <sup>-</sup> | Product number | [M-H-18] <sup>-</sup> | [M-H-44] <sup>-</sup> | [M-H-18-44] <sup>-</sup> | Other ions              |
|--------------------|----------------|-----------------------|-----------------------|--------------------------|-------------------------|
| 243                | <b>1</b>       | 225                   | –                     | 181                      | 197, 183                |
| 271                | <b>1</b>       | 253                   | –                     | 209                      | 225, 211                |
| 269                | <b>1</b>       | 251                   | 225                   | 207                      | 223, 211, 209, 195, 181 |
|                    | <b>2</b>       | 251                   | 225                   | –                        | 171, 155                |
| 297                | <b>1</b>       | 279                   | 253                   | –                        | 251, 237, 195, 173      |
|                    | <b>2</b>       | 279                   | 253                   | –                        | 171, 155                |
| 295                | <b>1</b>       | 277                   | 251                   | –                        | 237, 141                |
|                    | <b>2</b>       | 277                   | 251                   | –                        | 195, 179, 171           |
| 319                | <b>1</b>       | 301                   | 275                   | 257                      | 219, 205, 175, 113      |
|                    | <b>2</b>       | 301                   | 275                   | 257                      | 219, 191, 179, 167      |
| 343                | <b>1</b>       | 325                   | 299                   | 281                      | 285, 271, 255, 241      |
|                    | <b>2</b>       | 325                   | 299                   | 281                      | 233, 221, 205, 193, 161 |

**Figure S-1.** GC-MS analysis of fatty acids in human liver extract. PFB ester derivatives were prepared and analyzed by GC-MS in the electron impact negative ion mode.

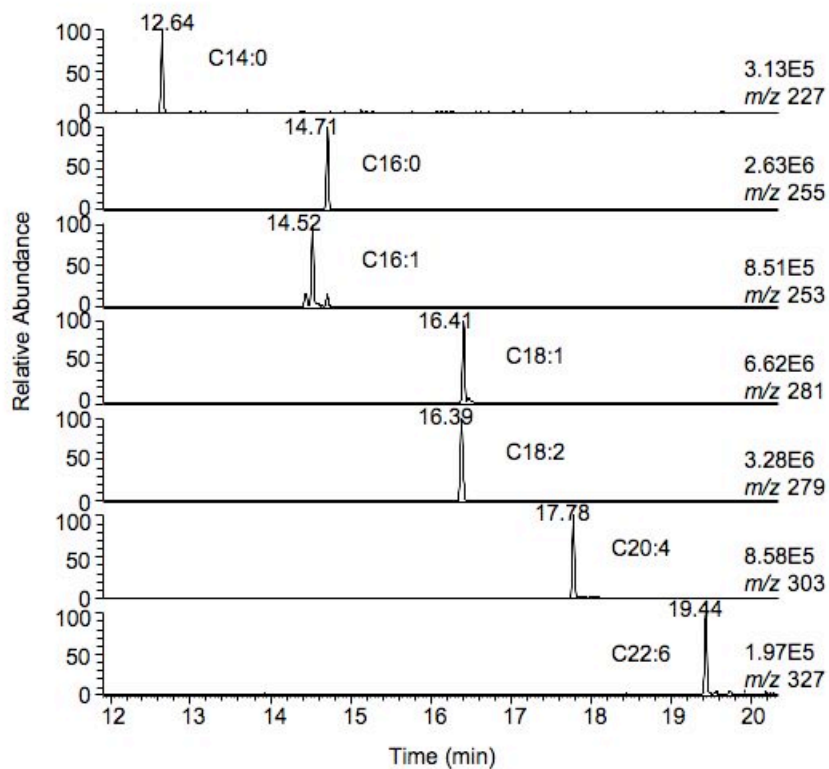

**Figure S-2.** Spectral changes induced by binding of C14:0 to P450 2C8. Purified P450 (2  $\mu\text{M}$ ) was titrated with C14:0 (in ethanol) in 100 mM phosphate buffer (pH 7.4). *A*, Absorbance difference spectra obtained from titration of P450 2C8. *B*, Plot of  $\Delta A_{390} - A_{420}$  versus the concentration of C14:0. The value of  $K_s$  was estimated as 8.0  $\mu\text{M}$ , using a hyperbolic equation in GraphPad Prism software (GraphPad Software, San Diego, CA).

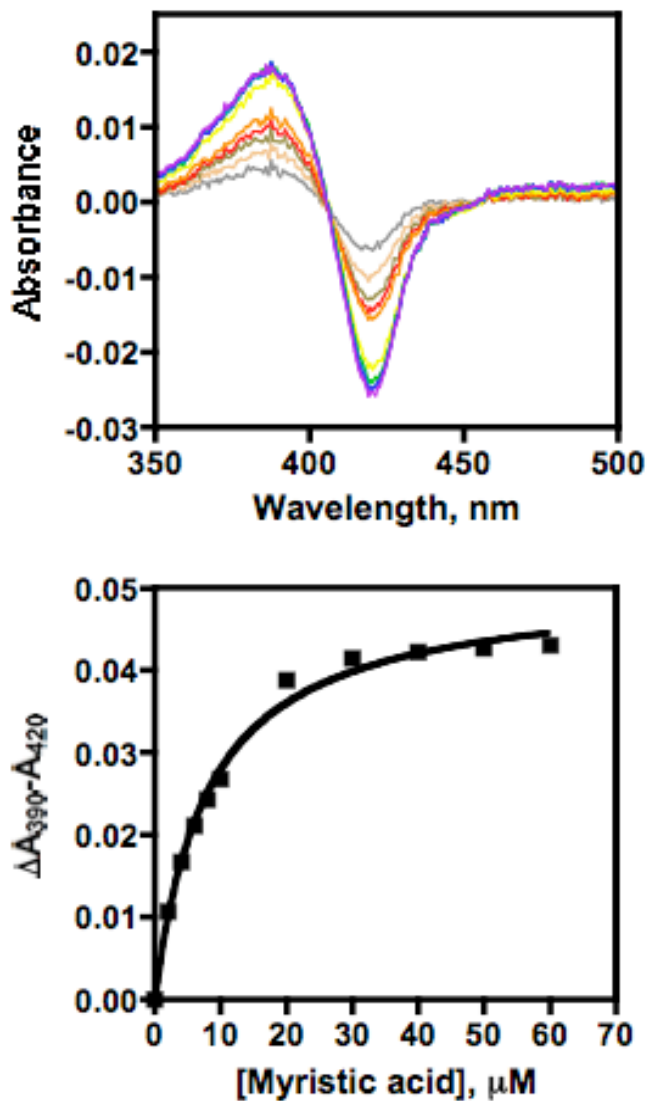

**Figure S-3.** GC-mass spectra of the hydroxylation product of the incubation of C14:0 with P450 1A2. The TMS derivatives were prepared for GC-MS assay in the electron impact mode.

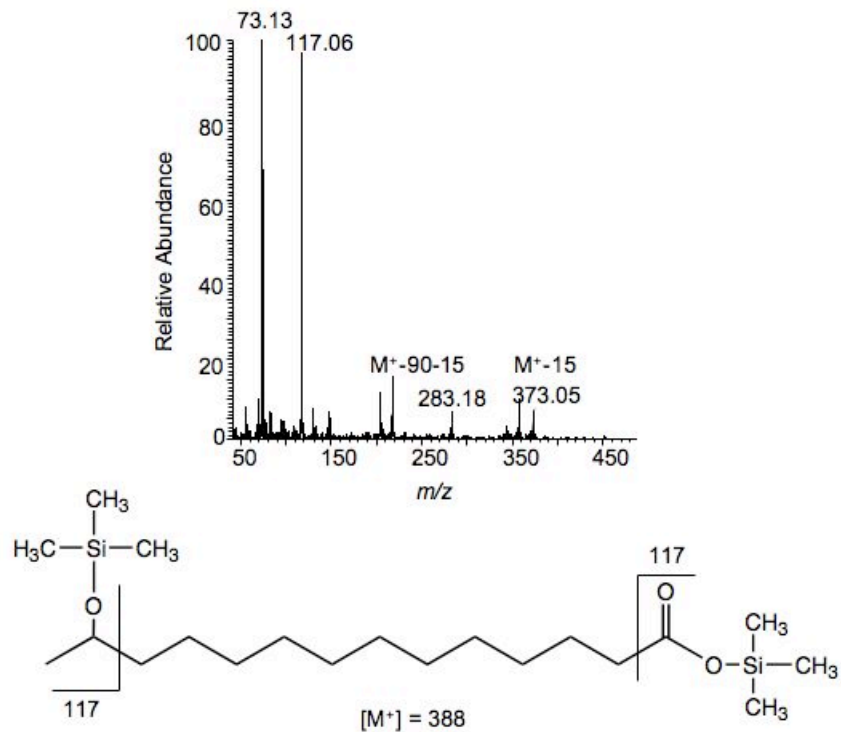

Supplement: NIHMS104440-supplement-1_si_001.pdf [file NIHMS104440-supplement-1_si_001.pdf]
